# Supplementary material for: The role of functional group concentration in solvation thermodynamics
Source: Royal Society of Chemistry journal article supplement (doi:10.1039/c0sc00209g), 2010-01-01
Supplement: c0sc00209g.pdf [file c0sc00209g.pdf]

## Supplementary Information

### The Role of Functional Group Concentration in Solvation Thermodynamics

*Niklaas J. Buurma, Joanne L. Cook, Christopher A. Hunter,\* Caroline M. R. Low, Jeremy G. Vinter*

**Table S1.** Solvent mixtures studied by automated titration of **1** into **2**.

| S <sub>1</sub>                  | S <sub>2</sub>                      |
|---------------------------------|-------------------------------------|
| <i>n</i> -octane                | di- <i>n</i> -hexyl ether           |
| <i>n</i> -octane                | di- <i>n</i> -octyl ether           |
| <i>n</i> -octane                | 2 % di- <i>n</i> -octyl ether       |
| <i>n</i> -octane                | 5 % di- <i>n</i> -octyl ether       |
| <i>n</i> -octane                | 10 % di- <i>n</i> -octyl ether      |
| <i>n</i> -octane                | di(ethyleneglycol)dibutyl ether     |
| <i>n</i> -octane                | tetra(ethyleneglycol)dimethyl ether |
| <i>n</i> -octane                | <i>n</i> -hexadecane                |
| <i>n</i> -hexadecane            | di- <i>n</i> -hexyl ether           |
| <i>n</i> -hexadecane            | di- <i>n</i> -octyl ether           |
| di- <i>n</i> -hexyl ether       | di- <i>n</i> -octyl ether           |
| di(ethyleneglycol)dibutyl ether | tetra(ethyleneglycol)dimethyl ether |
| di- <i>n</i> -octyl ether       | di(ethyleneglycol)dibutyl ether     |
| di- <i>n</i> -octyl ether       | tetra(ethyleneglycol)dimethyl ether |
